# Supplementary material for: CIrrMap250: Annual maps of China’s irrigated cropland from 2000 to 2020 developed through multisource data integration
Source: Copernicus journal article supplement (doi:10.5194/essd-2024-2), 2024-01-29
Supplement: Supplementary file 1 [file essd-2024-2-supplement.pdf]

# **Supplementary Information for CIrrMap250: Annual time-series of China's irrigated cropland maps from 2000 to 2020 developed through multisource data integration**

Ling Zhang<sup>1\*</sup>, Yanhua Xie<sup>2</sup>, Xiufang Zhu<sup>3</sup>, Qimin Ma<sup>4</sup>, Luca Brocca<sup>5</sup>

<sup>1</sup>Key Laboratory of Remote Sensing of Gansu Province, Heihe Remote Sensing Experimental Research Station, Northwest Institute of Eco-Environment and Resources, Chinese Academy of Sciences, Lanzhou 730000, China

<sup>2</sup>Department of Geography & Environmental Sustainability, The University of Oklahoma, 100 East Boyd St, Norman, OK 73019, USA

<sup>3</sup>State Key Laboratory of Remote Sensing Science, Beijing Normal University, Beijing 100875, China

<sup>4</sup>College of Resources and Environment, Chengdu University of Information Technology, Chengdu 610225, China

<sup>5</sup>Research Institute for Geo-Hydrological Protection, National Research Council, Perugia 06128, Italy

*Correspondence to:* Ling Zhang ([zhanglingky@lzb.ac.cn](mailto:zhanglingky@lzb.ac.cn))

## **Contents of this file**

Figures S1 to S7

Tables S1 to S5

## **Introduction**

This supplementary information includes 7 figures and 5 tables, which provide supplements to the descriptions of the data sets, methods, and results given in the main paper.

## 1 Supplementary Figures

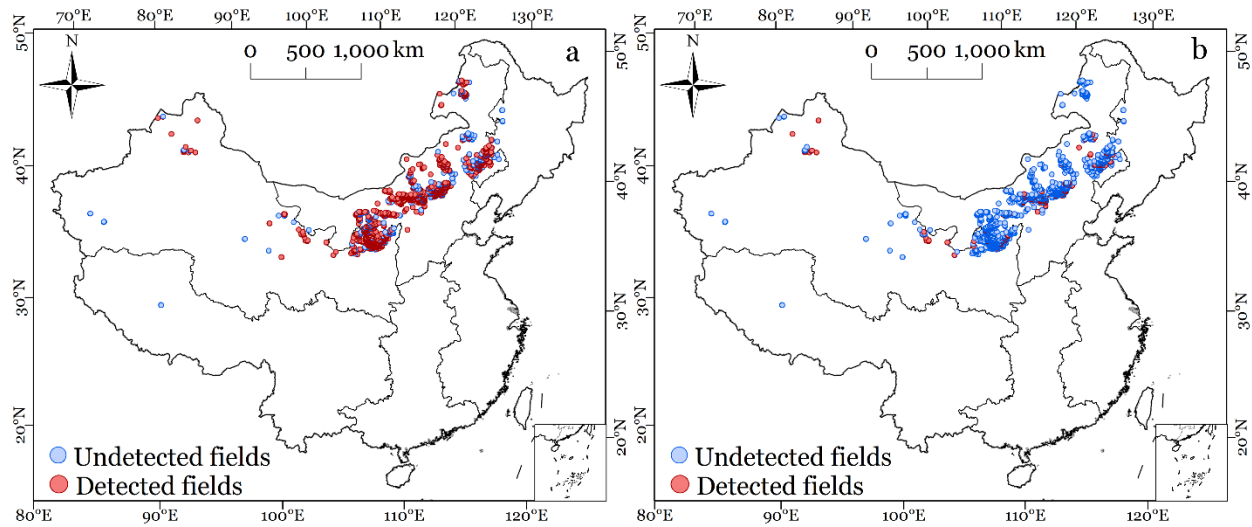

**Figure S1. Spatial distribution of the detected and undetected fields with center pivot irrigation systems for the year 2020. Panels a and b show the results of ClrrMap250 and IrriMap\_CN, respectively.**

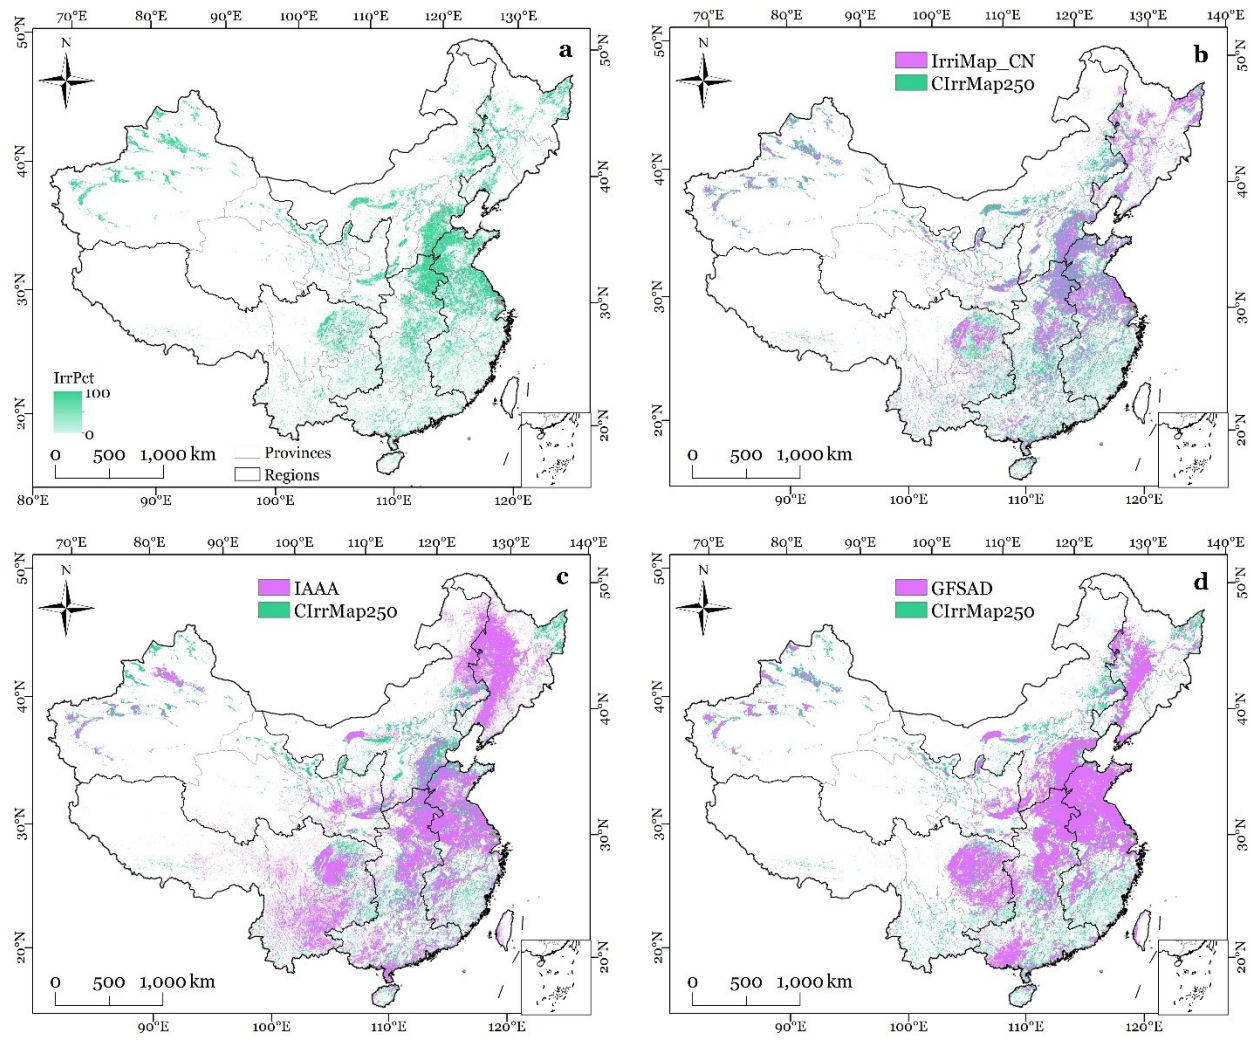

**Figure S2. Comparison of the distributions of irrigated cropland in CIrrMap250 with the existing products (IrriMap\_CN, IAAA, GFSAD).** Panel (a) shows the distribution of irrigated cropland in CIrrMap250, while the panels b, c and d display the comparison of irrigated cropland distribution.

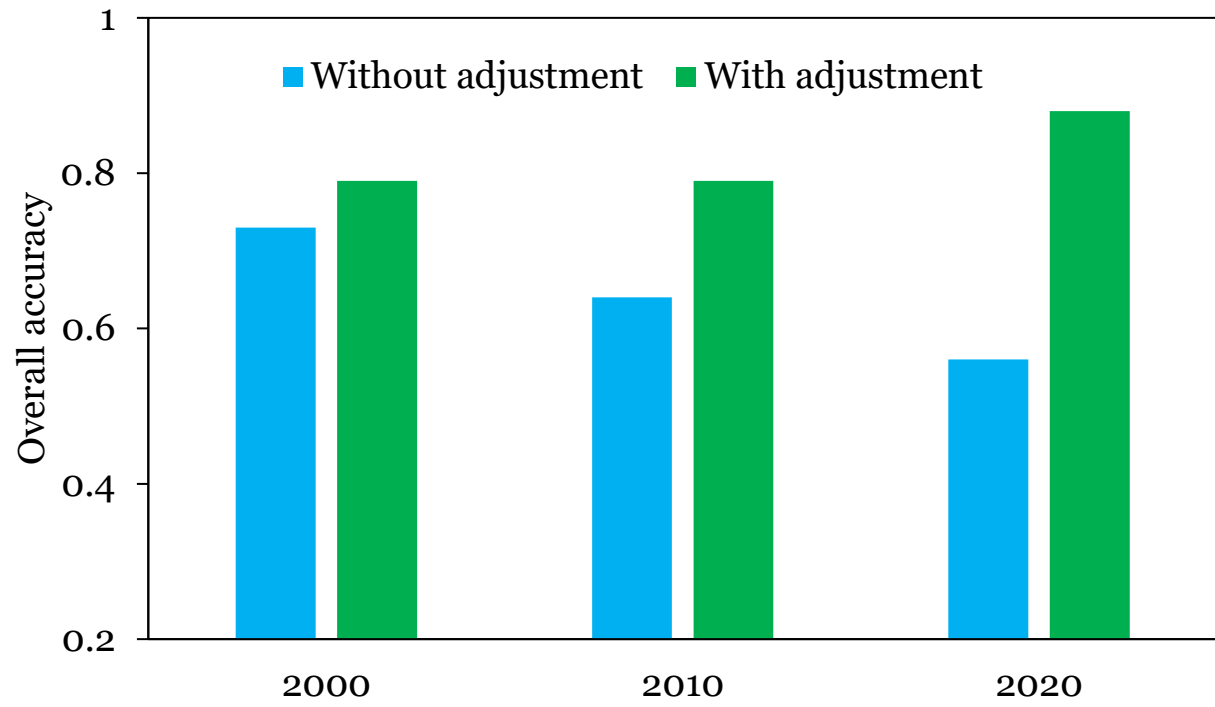

**Figure S3. Comparison of irrigated ratio estimates of CIrrMap250 and IrrMap\_CN in China, Northern China, Xinjiang Uygur Autonomous Region**

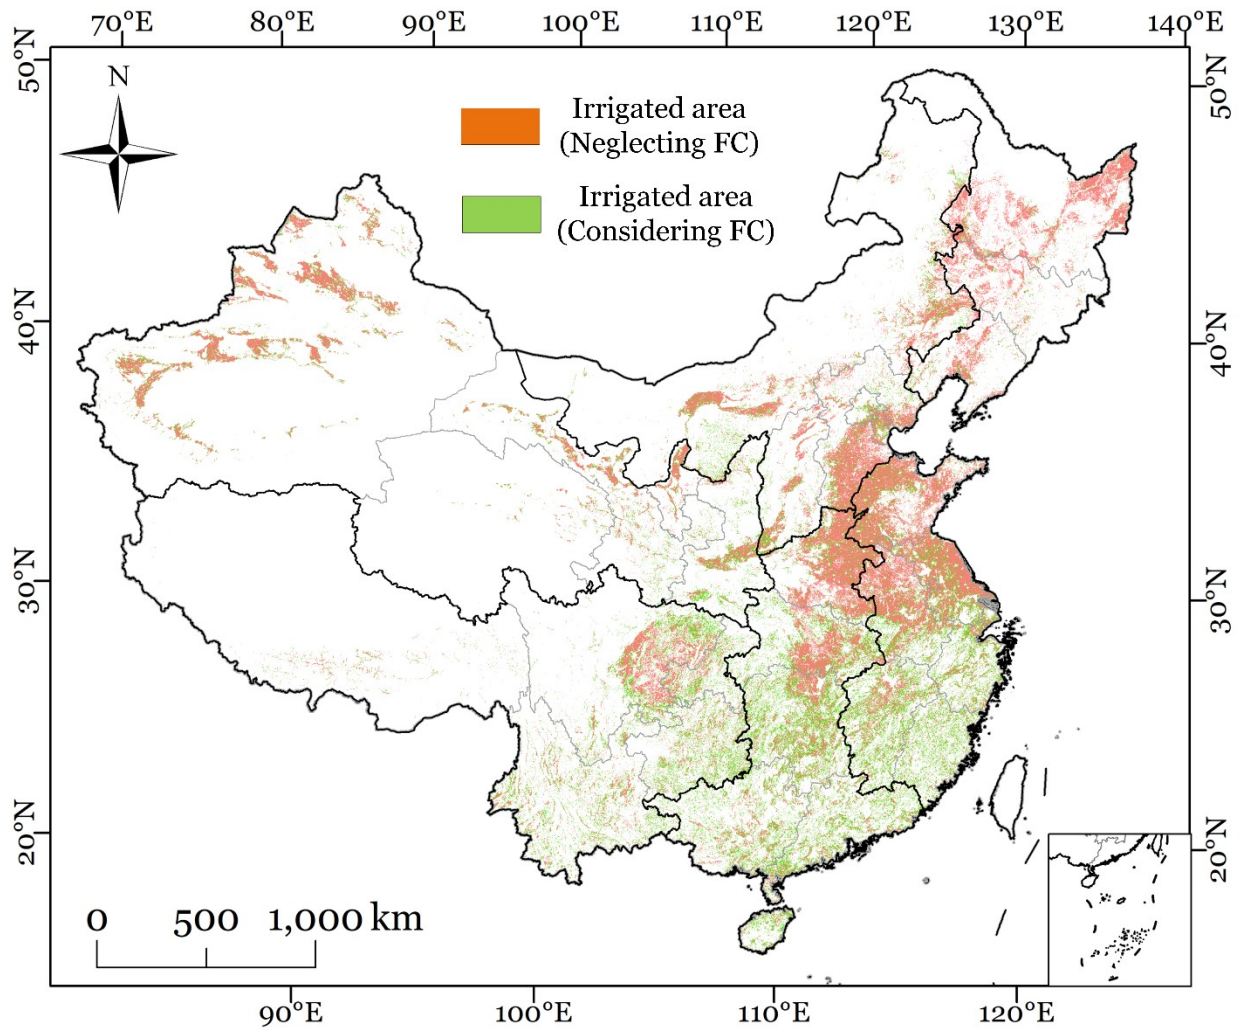

**Figure S4. Comparison of the performance of irrigated cropland maps developed based on the original irrigated area statistics (without adjustment) and the harmonized and reconciled irrigated areas (with adjustment, CIrrMap250)**

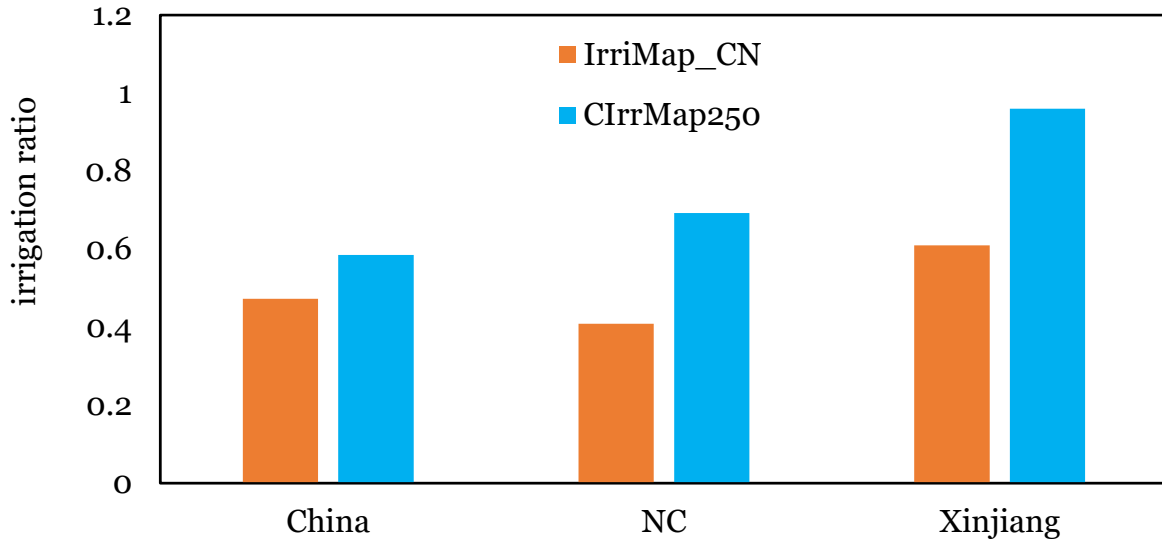

**Figure S5. Comparison of irrigated area distribution in the scenarios of considering fractional coverage (FC) of irrigated cropland (this study) and neglecting FC of irrigated cropland.**

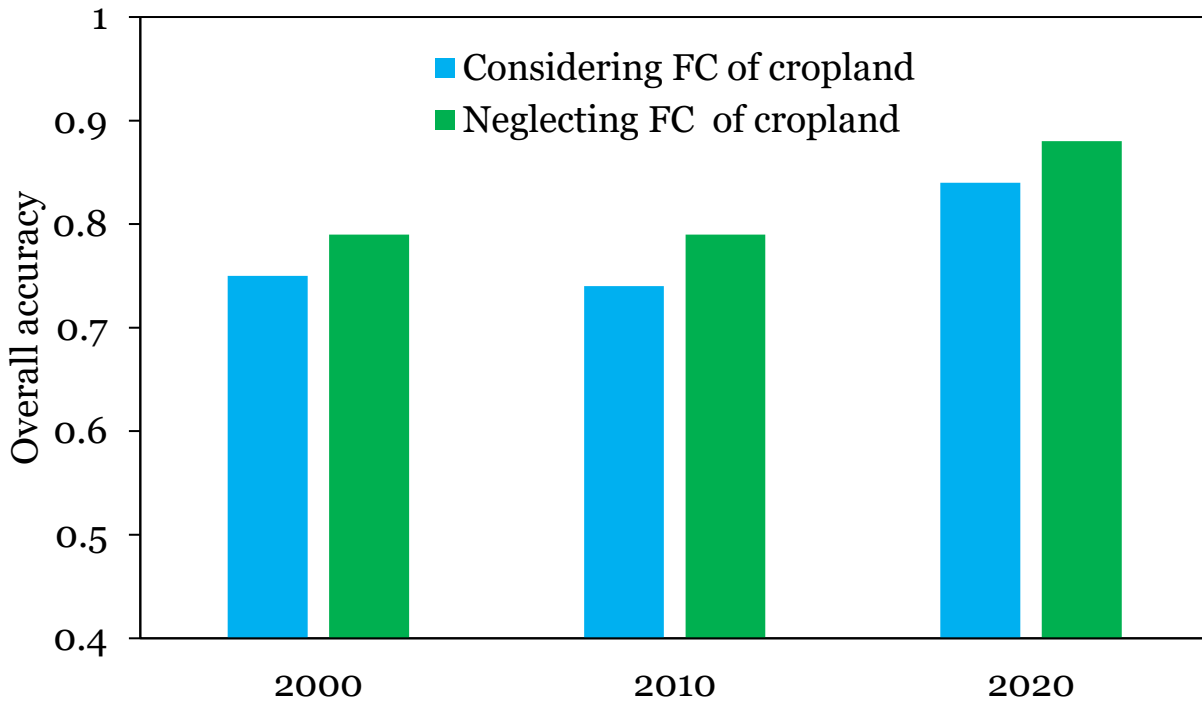

**Figure S6. Comparison of performance of irrigated area maps in the scenarios of considering fractional coverage (FC) of irrigated cropland (this study) and neglecting FC of irrigated cropland.**

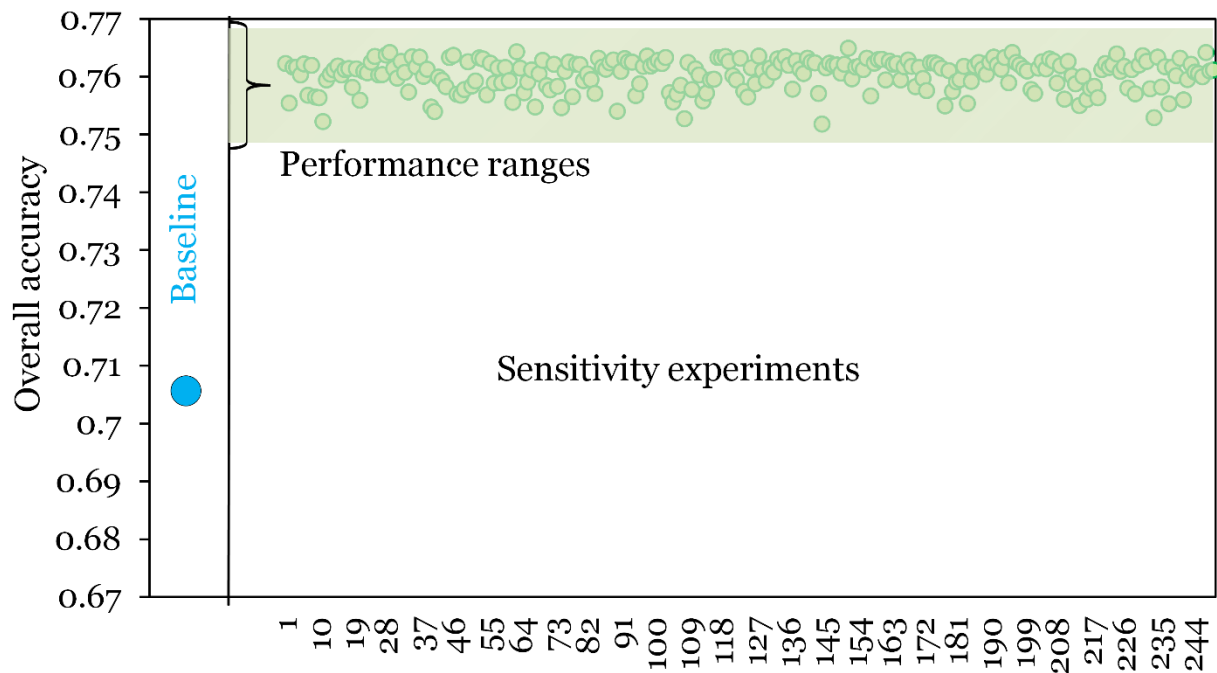

**Figure S7. Sensitivity analysis of the performance of irrigated cropland maps to the use of different irrigation suitability maps.** The performance of these irrigation maps was compared with the baseline irrigation map that was created by the method in our study while excluding irrigation suitability in the mapping process.

## 2 Supplementary Tables

**Table S1. Summary of the MODIS-derived vegetation indices used in this study**

| Vegetation indices | Formula                                                                                   | MODIS bands      | Resolution  |
|--------------------|-------------------------------------------------------------------------------------------|------------------|-------------|
| NDVI               | $(\text{NIR} - \text{Red}) / (\text{NIR} + \text{Red})$                                   | Bands 01, 02     | 250 m/16day |
| EVI                | $2.5 * (\text{NIR} - \text{Red}) / (\text{NIR} + 6 * \text{Red} - 7.5 * \text{Blue} + 1)$ | Bands 01, 02, 03 | 250 m/16day |
| GI                 | $\text{NIR} / \text{Green}$                                                               | Bands 01, 04     | 250 m/8day  |

Red: band 01, Blue: band 03, near-infrared (NIR): band 02, Green: band 04

**Table S2. Reclassification of irrigation suitability factors and their suitability values**

| Irrigation suitability factors | Reclassification                                                                                                                                             | Suitability value                                                         |
|--------------------------------|--------------------------------------------------------------------------------------------------------------------------------------------------------------|---------------------------------------------------------------------------|
| elevation                      | S1: < min+100<br>S2: [min+100, min+300]<br>S3: [min+300, min+500]<br>S4: > min+500                                                                           | S1=4<br>S2=3<br>S3=2<br>S4=2                                              |
| slope                          | S1: <2%<br>S2: [2%, 4%]<br>S3: [4%, 8%]<br>S4: > 8%                                                                                                          | S1=4<br>S2=3<br>S3=2<br>S4=2                                              |
| aridity index                  | S1: <0.1; S2: [0.1, 0.2];<br>S3: [0.2, 0.3]; S4: [0.3, 0.4]<br>S5: [0.4, 0.5]; S6: [0.5, 0.6]<br>S7: [0.6, 0.7]; S8: [0.7, 0.8]<br>S9: [0.8, 0.9]; S10: >0.9 | S1=10; S2= 9<br>S3=8; S4= 7<br>S5=6; S6= 5<br>S7=4; S8= 3<br>S9=2; S10= 1 |

Note: min is minimum elevation of the mapping unit



**Table S3. Optimized hyperparameters of the RF algorithm**

| Hyperparameters | Descriptions                                                | values |
|-----------------|-------------------------------------------------------------|--------|
| <i>Ntree</i>    | Number of trees                                             | 200    |
| <i>MinObs</i>   | Minimum number of observations per node                     | 10     |
| <i>Nsplit</i>   | Number of variables randomly sampled at each decision split | 7      |

**Table S4. Definitions of the performance metrics**

| Metrics             | Formula                                                                                                      | Variables                                                                                                                                                                                                                                                                                                                                                                                                                                      |
|---------------------|--------------------------------------------------------------------------------------------------------------|------------------------------------------------------------------------------------------------------------------------------------------------------------------------------------------------------------------------------------------------------------------------------------------------------------------------------------------------------------------------------------------------------------------------------------------------|
| Overall accuracy    | $\frac{\sum_{i=1}^n P_{ii}}{N}$                                                                              | <i>n</i> is the number of classes; <i>P<sub>ii</sub></i> is the number of pixels on row <i>i</i> and column <i>i</i> in the confusion matrix, which represent the total number of pixels correctly classified; <i>N</i> is total number of pixels used for accuracy evaluation; <i>P<sub>i+</sub></i> and <i>P<sub>+i</sub></i> are the total number of pixels on row <i>i</i> (observations) and column <i>i</i> (predictions), respectively. |
| F1-score            | $2 \frac{\frac{P_{ii}}{P_{+i}} \times \frac{P_{ii}}{P_{i+}}}{\frac{P_{ii}}{P_{+i}} + \frac{P_{ii}}{P_{i+}}}$ |                                                                                                                                                                                                                                                                                                                                                                                                                                                |
| Producer's accuracy | $\frac{P_{ii}}{P_{+i}}$                                                                                      |                                                                                                                                                                                                                                                                                                                                                                                                                                                |
| User's accuracy     | $\frac{P_{ii}}{P_{i+}}$                                                                                      |                                                                                                                                                                                                                                                                                                                                                                                                                                                |

<https://blog.csdn.net/lovefreewind/article/details/42672085>

**Table S5. Performance metric values of CIrrMap250 and the existing maps (IrriMap\_CN, IAAA, GFSAD). OA, PU, UA represent overall accuracy, producer's accuracy, and user's accuracy, respectively.**

| Year | Products   | OA   | F1-score | Irr PA | Irr UA | NIrr PA | NIrr UA |
|------|------------|------|----------|--------|--------|---------|---------|
| 2000 | CIrrMap250 | 0.79 | 0.78     | 0.80   | 0.78   | 0.77    | 0.79    |
|      | IrriMap_CN | 0.68 | 0.73     | 0.51   | 0.80   | 0.87    | 0.63    |
|      | IAAA       | 0.55 | 0.50     | 0.66   | 0.56   | 0.45    | 0.55    |
| 2010 | CIrrMap250 | 0.79 | 0.71     | 0.83   | 0.83   | 0.71    | 0.71    |
|      | IrriMap_CN | 0.66 | 0.62     | 0.61   | 0.81   | 0.75    | 0.53    |
|      | IAAA       | 0.61 | 0.50     | 0.64   | 0.71   | 0.54    | 0.46    |
|      | GFSAD      | 0.59 | 0.51     | 0.60   | 0.71   | 0.58    | 0.46    |
| 2020 | CIrrMap250 | 0.88 | -        | 0.88   | 1      | -       | -       |
|      | IrriMap_CN | 0.20 | -        | 0.20   | 1      | -       | -       |
